# Supplementary material
Source: MDPI journal article supplement (https://www.mdpi.com/2071-1050/16/10/3982)
Supplement: s1 [file s1]

**Table S1** The results of the analysis of countries' contributions using CiteSpace

| Freq | Burst | BurstBegin | BurstEnd | Degree | Centrality | Sigma | Label            | Author           | Year |
|------|-------|------------|----------|--------|------------|-------|------------------|------------------|------|
| 345  | 0     |            |          | 19     | 0.69       | 1     | People's R China | People's R China | 2013 |
| 51   | 0     |            |          | 11     | 0.17       | 1     | USA              | USA              | 2013 |
| 29   | 0     |            |          | 12     | 0.23       | 1     | South Korea      | South Korea      | 2013 |
| 29   | 0     |            |          | 7      | 0.02       | 1     | India            | India            | 2013 |
| 27   | 0     |            |          | 5      | 0.10       | 1     | Iran             | Iran             | 2016 |
| 16   | 0     |            |          | 4      | 0.04       | 1     | Brazil           | Brazil           | 2013 |
| 14   | 0     |            |          | 5      | 0.08       | 1     | Egypt            | Egypt            | 2017 |
| 13   | 2.54  | 2018       | 2019     | 7      | 0.10       | 1.27  | Spain            | Spain            | 2013 |
| 11   | 0     |            |          | 8      | 0.16       | 1     | Taiwan           | Taiwan           | 2017 |
| 11   | 0     |            |          | 3      | 0.01       | 1     | Canada           | Canada           | 2014 |
| 8    | 0     |            |          | 5      | 0.02       | 1     | Australia        | Australia        | 2013 |
| 8    | 0     |            |          | 2      | 0          | 1     | Mexico           | Mexico           | 2015 |
| 7    | 2.93  | 2018       | 2019     | 8      | 0.09       | 1.28  | France           | France           | 2018 |
| 7    | 0     |            |          | 8      | 0.19       | 1     | Italy            | Italy            | 2015 |
| 7    | 2.59  | 2016       | 2018     | 6      | 0.21       | 1.63  | England          | England          | 2016 |
| 7    | 0     |            |          | 5      | 0.02       | 1     | Saudi Arabia     | Saudi Arabia     | 2015 |
| 7    | 2.84  | 2014       | 2017     | 2      | 0          | 1     | Singapore        | Singapore        | 2014 |
| 6    | 0     |            |          | 4      | 0          | 1     | Japan            | Japan            | 2015 |
| 5    | 0     |            |          | 8      | 0.03       | 1     | U Arab Emirates  | U Arab Emirates  | 2020 |
| 4    | 0     |            |          | 4      | 0.08       | 1     | Russia           | Russia           | 2013 |
| 3    | 0     |            |          | 2      | 0          | 1     | Serbia           | Serbia           | 2019 |
| 3    | 0     |            |          | 2      | 0          | 1     | Pakistan         | Pakistan         | 2022 |
| 2    | 0     |            |          | 3      | 0          | 1     | Netherlands      | Netherlands      | 2018 |
| 2    | 0     |            |          | 2      | 0          | 1     | Greece           | Greece           | 2020 |
| 2    | 0     |            |          | 2      | 0.08       | 1     | Tunisia          | Tunisia          | 2023 |
| 2    | 0     |            |          | 1      | 0          | 1     | Poland           | Poland           | 2021 |
| 2    | 0     |            |          | 1      | 0          | 1     | Denmark          | Denmark          | 2020 |
| 2    | 0     |            |          | 0      | 0          | 1     | Morocco          | Morocco          | 2023 |
| 1    | 0     |            |          | 3      | 0          | 1     | Lebanon          | Lebanon          | 2023 |
| 1    | 0     |            |          | 3      | 0          | 1     | Algeria          | Algeria          | 2023 |
| 1    | 0     |            |          | 2      | 0          | 1     | Philippines      | Philippines      | 2019 |
| 1    | 0     |            |          | 2      | 0          | 1     | Malaysia         | Malaysia         | 2018 |
| 1    | 0     |            |          | 2      | 0          | 1     | Chile            | Chile            | 2016 |
| 1    | 0     |            |          | 2      | 0          | 1     | Iraq             | Iraq             | 2018 |
| 1    | 0     |            |          | 1      | 0          | 1     | South Africa     | South Africa     | 2023 |
| 1    | 0     |            |          | 1      | 0          | 1     | Germany          | Germany          | 2013 |
| 1    | 0     |            |          | 1      | 0          | 1     | Indonesia        | Indonesia        | 2023 |
| 1    | 0     |            |          | 1      | 0          | 1     | Turkiye          | Turkiye          | 2023 |
| 1    | 0     |            |          | 0      | 0          | 1     | Turkey           | Turkey           | 2019 |
| 1    | 0     |            |          | 0      | 0          | 1     | Vietnam          | Vietnam          | 2019 |
| 1    | 0     |            |          | 0      | 0          | 1     | Slovenia         | Slovenia         | 2019 |
| 1    | 0     |            |          | 0      | 0          | 1     | Ethiopia         | Ethiopia         | 2023 |
| 1    | 0     |            |          | 0      | 0          | 1     | Lithuania        | Lithuania        | 2013 |

**Table S2** The results of the analysis of countries' contributions using VOSviewer

| Id | Country          | Documents | %Document | Citations | Citation per document | GDP | Total link strength |
|----|------------------|-----------|-----------|-----------|-----------------------|-----|---------------------|
| 32 | People's R China | 345       | 55.12     | 10037     | 29.09                 |     | 56                  |
| 53 | USA              | 52        | 8.31      | 2050      | 39.42                 |     | 39                  |
| 44 | South Korea      | 29        | 4.63      | 426       | 14.69                 |     | 20                  |
| 16 | India            | 29        | 4.63      | 1378      | 47.52                 |     | 8                   |
| 18 | Iran             | 27        | 4.31      | 550       | 20.37                 |     | 4                   |
| 3  | Brazil           | 16        | 2.56      | 451       | 28.19                 |     | 7                   |
| 45 | Spain            | 14        | 2.24      | 415       | 29.64                 |     | 7                   |
| 9  | Egypt            | 14        | 2.24      | 189       | 13.50                 |     | 11                  |
| 48 | Taiwan           | 12        | 1.92      | 397       | 33.08                 |     | 9                   |
| 5  | Canada           | 12        | 1.92      | 275       | 22.92                 |     | 5                   |
| 2  | Australia        | 10        | 1.60      | 367       | 36.70                 |     | 13                  |
| 39 | Saudi Arabia     | 9         | 1.44      | 220       | 24.44                 |     | 9                   |
| 10 | England          | 9         | 1.44      | 356       | 39.56                 |     | 10                  |
| 27 | Mexico           | 8         | 1.28      | 83        | 10.38                 |     | 4                   |
| 22 | Italy            | 8         | 1.28      | 279       | 34.88                 |     | 6                   |
| 12 | France           | 8         | 1.28      | 442       | 55.25                 |     | 8                   |
| 41 | Singapore        | 7         | 1.12      | 529       | 75.57                 |     | 4                   |
| 52 | U Arab Emirates  | 6         | 0.96      | 138       | 23.00                 |     | 10                  |
| 23 | Japan            | 6         | 0.96      | 47        | 7.83                  |     | 4                   |
| 40 | Serbia           | 5         | 0.80      | 31        | 6.20                  |     | 2                   |
|    |                  | 626       |           |           |                       |     |                     |

**Table S3** The results from analyzing the contributions of institutions using CiteSpace

| Freq | Burst | BurstBegin | BurstEnd | Degree | Centrality | Sigma | Label                                                                                                                |
|------|-------|------------|----------|--------|------------|-------|----------------------------------------------------------------------------------------------------------------------|
| 22   | 0     |            |          | 12     | 0.12       | 1     | Chinese Academy of Sciences                                                                                          |
| 13   | 3.52  | 2019       | 2020     | 3      | 0          | 1.01  | Tianjin University                                                                                                   |
| 9    | 0     |            |          | 6      | 0.09       | 1     | Egyptian Knowledge Bank (EKB)                                                                                        |
| 8    | 0     |            |          | 4      | 0.05       | 1     | Zhejiang University                                                                                                  |
| 8    | 0     |            |          | 2      | 0          | 1     | Harbin Institute of Technology                                                                                       |
| 8    | 0     |            |          | 2      | 0          | 1     | Nankai University                                                                                                    |
| 7    | 0     |            |          | 2      | 0.02       | 1     | Xi'an University of Architecture & Technology                                                                        |
| 7    | 0     |            |          | 2      | 0          | 1     | Tiangong University                                                                                                  |
| 6    | 0     |            |          | 2      | 0          | 1     | Xi'an Jiaotong University                                                                                            |
| 5    | 0     |            |          | 2      | 0          | 1     | Centre National de la Recherche Scientifique (CNRS)                                                                  |
| 5    | 0     |            |          | 1      | 0          | 1     | Hunan University                                                                                                     |
| 5    | 0     |            |          | 1      | 0          | 1     | Beijing University of Technology                                                                                     |
| 5    | 0     |            |          | 1      | 0          | 1     | Beijing University of Chemical Technology                                                                            |
| 5    | 0     |            |          | 0      | 0          | 1     | Indian Institute of Technology System (IIT System)                                                                   |
| 5    | 0     |            |          | 0      | 0          | 1     | Yangzhou University                                                                                                  |
| 4    | 0     |            |          | 3      | 0.03       | 1     | Nanjing University                                                                                                   |
| 4    | 0     |            |          | 7      | 0.02       | 1     | University of Chinese Academy of Sciences                                                                            |
| 4    | 0     |            |          | 1      | 0          | 1     | China University of Mining & Technology                                                                              |
| 4    | 0     |            |          | 1      | 0          | 1     | Zhejiang University of Technology                                                                                    |
| 4    | 0     |            |          | 1      | 0          | 1     | Jilin Normal University                                                                                              |
| 3    | 0     |            |          | 2      | 0          | 1     | Ecole nationale superieure de chimie de Montpellier                                                                  |
| 3    | 0     |            |          | 2      | 0          | 1     | Universite de Montpellier                                                                                            |
| 3    | 0     |            |          | 2      | 0          | 1     | Peking University                                                                                                    |
| 3    | 0     |            |          | 1      | 0          | 1     | Sichuan University                                                                                                   |
| 3    | 0     |            |          | 0      | 0          | 1     | University of Barcelona                                                                                              |
| 3    | 0     |            |          | 0      | 0          | 1     | Amirkabir University of Technology                                                                                   |
| 3    | 0     |            |          | 0      | 0          | 1     | Guangxi University                                                                                                   |
| 3    | 0     |            |          | 0      | 0          | 1     | Dalian University of Technology                                                                                      |
| 2    | 0     |            |          | 3      | 0          | 1     | Kunming University of Science & Technology                                                                           |
| 2    | 0     |            |          | 3      | 0          | 1     | Fujian Institute of Research on the Structure of Matter<br>Research Center for Eco-Environmental Sciences<br>(RCEES) |
| 2    | 0     |            |          | 3      | 0          | 1     | Institute of Process Engineering                                                                                     |
| 2    | 0     |            |          | 3      | 0          | 1     | Tsinghua University                                                                                                  |
| 2    | 0     |            |          | 2      | 0          | 1     | University of Puerto Rico Rio Piedras                                                                                |
| 2    | 0     |            |          | 2      | 0          | 1     | University of Sharjah                                                                                                |
| 2    | 0     |            |          | 2      | 0          | 1     | Minia University                                                                                                     |
| 2    | 0     |            |          | 2      | 0          | 1     | Fudan University                                                                                                     |
| 2    | 0     |            |          | 2      | 0          | 1     | Shaanxi University of Science & Technology                                                                           |
| 2    | 0     |            |          | 2      | 0          | 1     | University of Puerto Rico                                                                                            |
| 2    | 0     |            |          | 2      | 0          | 1     | University of Puerto Rico Medical Sciences Campus                                                                    |
| 2    | 0     |            |          | 2      | 0          | 1     | East China Jiaotong University                                                                                       |

|   |   |   |   |   |                                                       |
|---|---|---|---|---|-------------------------------------------------------|
| 2 | 0 | 1 | 0 | 1 | Jadavpur University                                   |
|   |   |   |   |   | Indian Institute of Engineering Science Technology    |
| 2 | 0 | 1 | 0 | 1 | Shibpur (IEST)                                        |
| 2 | 0 | 1 | 0 | 1 | University of Quebec                                  |
| 2 | 0 | 1 | 0 | 1 | University of Science & Technology of China           |
|   |   |   |   |   | POWERCHINA Huadong Engineering Corporation            |
| 2 | 0 | 1 | 0 | 1 | Limited                                               |
| 2 | 0 | 1 | 0 | 1 | Shandong Normal University                            |
| 2 | 0 | 1 | 0 | 1 | Chongqing University                                  |
| 2 | 0 | 1 | 0 | 1 | Institut national de la recherche scientifique (INRS) |
| 2 | 0 | 1 | 0 | 1 | Dongguan University of Technology                     |
| 2 | 0 | 0 | 0 | 1 | Harvard University                                    |
| 2 | 0 | 0 | 0 | 1 | Seoul National University (SNU)                       |
| 2 | 0 | 0 | 0 | 1 | Kongju National University                            |
| 2 | 0 | 0 | 0 | 1 | Anhui Normal University                               |
| 2 | 0 | 0 | 0 | 1 | China University of Geosciences                       |
| 2 | 0 | 0 | 0 | 1 | Beijing Normal University                             |
| 2 | 0 | 0 | 0 | 1 | Donghua University                                    |
| 2 | 0 | 0 | 0 | 1 | Nanjing University of Science & Technology            |
| 2 | 0 | 0 | 0 | 1 | Southwest University of Science & Technology - China  |
| 2 | 0 | 0 | 0 | 1 | Tongji University                                     |
| 2 | 0 | 0 | 0 | 1 | Shanghai University                                   |
| 2 | 0 | 0 | 0 | 1 | Dalian Maritime University                            |
| 2 | 0 | 0 | 0 | 1 | Universidade de Sao Paulo                             |
| 2 | 0 | 0 | 0 | 1 | Jiaxing University                                    |
| 2 | 0 | 0 | 0 | 1 | Shenzhen University                                   |
| 2 | 0 | 0 | 0 | 1 | King Saud University                                  |

---

**Table S4** Co-authorship and citations of authors in the field nanostructured electrooxidative technology

| Id   | Author                        | Documents | Citations | Total link strength | Average citation per document |
|------|-------------------------------|-----------|-----------|---------------------|-------------------------------|
| 2027 | Xu, Li                        | 9         | 358       | 43                  | 39.78                         |
| 191  | Chang, Limin                  | 9         | 337       | 71                  | 37.44                         |
| 383  | Duan, Xiaoyue                 | 9         | 337       | 71                  | 37.44                         |
| 2069 | Yan, Wei                      | 8         | 306       | 35                  | 38.25                         |
| 1817 | Wang, Hong                    | 8         | 203       | 27                  | 25.38                         |
| 902  | Li, Jianxin                   | 8         | 92        | 17                  | 11.50                         |
| 2437 | Zhu, Kai                      | 7         | 364       | 52                  | 52.00                         |
| 1592 | Sires, Ignasi                 | 7         | 298       | 7                   | 42.57                         |
| 637  | Hu, Xiang                     | 7         | 135       | 32                  | 19.29                         |
| 1679 | Sun, Zhirong                  | 7         | 124       | 36                  | 17.71                         |
| 167  | Cao, Dianxue                  | 6         | 559       | 68                  | 93.17                         |
| 2138 | Ye, Ke                        | 6         | 559       | 68                  | 93.17                         |
| 423  | Fang, Wenyan                  | 6         | 247       | 69                  | 41.17                         |
| 1803 | Wang, Fengwu                  | 6         | 247       | 69                  | 41.17                         |
| 2028 | Xu, Mai                       | 6         | 247       | 69                  | 41.17                         |
| 2431 | Zhu, Chuangao                 | 6         | 247       | 69                  | 41.17                         |
| 154  | Brillas, Enric                | 6         | 240       | 5                   | 40.00                         |
| 2021 | Xu, Hao                       | 6         | 125       | 28                  | 20.83                         |
| 266  | Cheng, Kui                    | 5         | 412       | 51                  | 82.40                         |
| 1810 | Wang, Guiling                 | 5         | 412       | 51                  | 82.40                         |
| 1242 | Meng, Xiaoyang                | 5         | 314       | 35                  | 62.80                         |
| 1688 | Tang, Bo                      | 5         | 308       | 19                  | 61.60                         |
| 1995 | Xie, Junfeng                  | 5         | 308       | 19                  | 61.60                         |
| 575  | Han, Weiqing                  | 5         | 241       | 28                  | 48.20                         |
| 2408 | Zhou, Minghua                 | 5         | 240       | 23                  | 48.00                         |
| 1091 | Liu, Yanbiao                  | 5         | 223       | 9                   | 44.60                         |
| 1078 | Liu, Wei                      | 5         | 202       | 47                  | 40.40                         |
| 240  | Chen, Wei                     | 5         | 184       | 41                  | 36.80                         |
| 1148 | Luo, Lin                      | 5         | 181       | 59                  | 36.20                         |
| 1415 | Qian, Guangfu                 | 5         | 181       | 59                  | 36.20                         |
| 2154 | Yin, Shibin                   | 5         | 181       | 59                  | 36.20                         |
| 1216 | Martinez-Huitle,<br>Carlos A. | 5         | 172       | 2                   | 34.40                         |
| 1978 | Xia, Yijing                   | 5         | 159       | 39                  | 31.80                         |
| 228  | Chen, Min                     | 5         | 105       | 22                  | 21.00                         |
| 1245 | Mengelzadeh,<br>Nezamaddin    | 5         | 97        | 2                   | 19.40                         |
| 380  | Duan, Pingzhou                | 5         | 85        | 30                  | 17.00                         |
| 268  | Cheng, Shaoan                 | 5         | 67        | 15                  | 13.40                         |

**Table S5** Keyword network summary table

| Freq | Burst | BurstBegin | BurstEnd | Degree | Centrality | Sigma | PageRank | Label                                            |
|------|-------|------------|----------|--------|------------|-------|----------|--------------------------------------------------|
| 182  | 0     |            |          | 41     | 0.03       | 1     | 0        | electrochemical oxidation                        |
| 138  | 0     |            |          | 56     | 0.10       | 1     | 0        | degradation                                      |
| 121  | 0     |            |          | 64     | 0.11       | 1     | 0        | electrooxidation                                 |
| 120  | 0     |            |          | 55     | 0.10       | 1     | 0        | oxidation                                        |
| 114  | 0     |            |          | 40     | 0.06       | 1     | 0        | removal                                          |
| 105  | 0     |            |          | 45     | 0.06       | 1     | 0        | waste water                                      |
| 94   | 0     |            |          | 40     | 0.04       | 1     | 0        | performance                                      |
| 82   | 6.23  | 2013       | 2018     | 30     | 0.02       | 1.13  | 0        | waste water treatment                            |
| 80   | 0     |            |          | 43     | 0.07       | 1     | 0        | nanoparticles                                    |
| 71   | 0     |            |          | 49     | 0.08       | 1     | 0        | organic pollutants                               |
| 58   | 0     |            |          | 62     | 0.09       | 1     | 0        | electrochemical degradation                      |
| 55   | 0     |            |          | 42     | 0.05       | 1     | 0        | anode                                            |
| 54   | 0     |            |          | 48     | 0.08       | 1     | 0        | electrocatalytic oxidation<br>advanced oxidation |
| 49   | 0     |            |          | 37     | 0.03       | 1     | 0        | processes                                        |
| 46   | 0     |            |          | 31     | 0.03       | 1     | 0        | mechanism                                        |
| 45   | 0     |            |          | 32     | 0.02       | 1     | 0        | catalysts                                        |
| 43   | 0     |            |          | 53     | 0.07       | 1     | 0        | waste-water                                      |
| 40   | 0     |            |          | 36     | 0.04       | 1     | 0        | electrode                                        |
| 40   | 2.91  | 2014       | 2017     | 31     | 0.03       | 1.08  | 0        | electrodes                                       |
| 39   | 5.57  | 2015       | 2018     | 51     | 0.05       | 1.32  | 0        | anodic oxidation                                 |
| 39   | 5.17  | 2014       | 2016     | 48     | 0.05       | 1.3   | 0        | carbon nanotube                                  |
| 37   | 0     |            |          | 39     | 0.04       | 1     | 0        | fabrication                                      |
| 36   | 0     |            |          | 43     | 0.06       | 1     | 0        | carbon nanotubes                                 |
| 35   | 0     |            |          | 34     | 0.03       | 1     | 0        | kinetics                                         |
| 34   | 0     |            |          | 35     | 0.04       | 1     | 0        | wastewater treatment                             |
| 34   | 0     |            |          | 30     | 0.03       | 1     | 0        | water                                            |
| 33   | 0     |            |          | 41     | 0.05       | 1     | 0        | efficient                                        |
| 32   | 5.68  | 2013       | 2017     | 33     | 0.03       | 1.16  | 0        | phenol                                           |
| 30   | 0     |            |          | 37     | 0.04       | 1     | 0        | catalyst                                         |
| 30   | 0     |            |          | 26     | 0.03       | 1     | 0        | reduction                                        |
| 28   | 2.59  | 2014       | 2018     | 29     | 0.03       | 1.09  | 0        | anodic-oxidation                                 |
| 28   | 0     |            |          | 22     | 0.02       | 1     | 0        | generation                                       |
| 27   | 0     |            |          | 47     | 0.08       | 1     | 0        | boron doped diamond                              |
| 27   | 0     |            |          | 43     | 0.06       | 1     | 0        | acid                                             |
| 27   | 0     |            |          | 38     | 0.04       | 1     | 0        | nanosheets                                       |
| 27   | 0     |            |          | 33     | 0.03       | 1     | 0        | adsorption                                       |
| 27   | 0     |            |          | 19     | 0.01       | 1     | 0        | oxygen evolution                                 |
| 26   | 0     |            |          | 35     | 0.06       | 1     | 0        | aqueous-solution                                 |
| 23   | 0     |            |          | 31     | 0.03       | 1     | 0        | hydrogen production                              |
| 23   | 0     |            |          | 31     | 0.03       | 1     | 0        | carbon                                           |
| 22   | 0     |            |          | 37     | 0.04       | 1     | 0        | mineralization                                   |

|    |      |      |      |    |      |      |   |                              |
|----|------|------|------|----|------|------|---|------------------------------|
| 22 | 2.52 | 2016 | 2021 | 26 | 0.02 | 1.05 | 0 | oxide                        |
| 21 | 0    |      |      | 30 | 0.03 | 1    | 0 | hydroxyl radicals            |
| 21 | 2.87 | 2020 | 2023 | 21 | 0    | 1.01 | 0 | urea oxidation reaction      |
| 20 | 0    |      |      | 35 | 0.03 | 1    | 0 | highly efficient             |
| 18 | 0    |      |      | 33 | 0.04 | 1    | 0 | activated carbon             |
| 18 | 0    |      |      | 30 | 0.02 | 1    | 0 | pbo2 electrode               |
| 18 | 0    |      |      | 30 | 0.01 | 1    | 0 | hydrogen evolution           |
| 18 | 0    |      |      | 16 | 0    | 1    | 0 | electrocatalytic degradation |
| 17 | 0    |      |      | 45 | 0.05 | 1    | 0 | evolution                    |
| 17 | 0    |      |      | 29 | 0.02 | 1    | 0 | electrocatalysts             |
| 17 | 0    |      |      | 29 | 0.02 | 1    | 0 | arrays                       |
| 17 | 3.05 | 2019 | 2021 | 22 | 0.01 | 1.02 | 0 | hydrogen evolution reaction  |
| 15 | 0    |      |      | 14 | 0    | 1    | 0 | pollutants                   |
| 14 | 0    |      |      | 23 | 0.01 | 1    | 0 | dye                          |
| 14 | 2.84 | 2019 | 2021 | 17 | 0.01 | 1.02 | 0 | hydrogen                     |
| 12 | 0    |      |      | 27 | 0.03 | 1    | 0 | electrocatalytic activity    |
| 12 | 3.38 | 2018 | 2019 | 21 | 0.01 | 1.04 | 0 | graphene                     |
| 12 | 0    |      |      | 16 | 0.01 | 1    | 0 | advanced oxidation           |
| 11 | 0    |      |      | 23 | 0.02 | 1    | 0 | urea electrooxidation        |
| 11 | 0    |      |      | 21 | 0.02 | 1    | 0 | nanocomposite                |
| 11 | 2.58 | 2018 | 2021 | 24 | 0.01 | 1.02 | 0 | aqueous-solutions            |
| 11 | 2.67 | 2021 | 2023 | 19 | 0.01 | 1.03 | 0 | oxygen                       |
| 11 | 0    |      |      | 17 | 0.01 | 1    | 0 | nickel                       |
| 11 | 3.2  | 2020 | 2021 | 16 | 0.01 | 1.03 | 0 | ni                           |
| 10 | 0    |      |      | 25 | 0.02 | 1    | 0 | anodes                       |
| 10 | 0    |      |      | 24 | 0.02 | 1    | 0 | electrochemical advanced     |
| 10 | 0    |      |      | 21 | 0.02 | 1    | 0 | oxidation                    |
| 10 | 0    |      |      | 21 | 0.02 | 1    | 0 | pharmaceuticals              |
| 10 | 0    |      |      | 23 | 0.01 | 1    | 0 | foam                         |

---





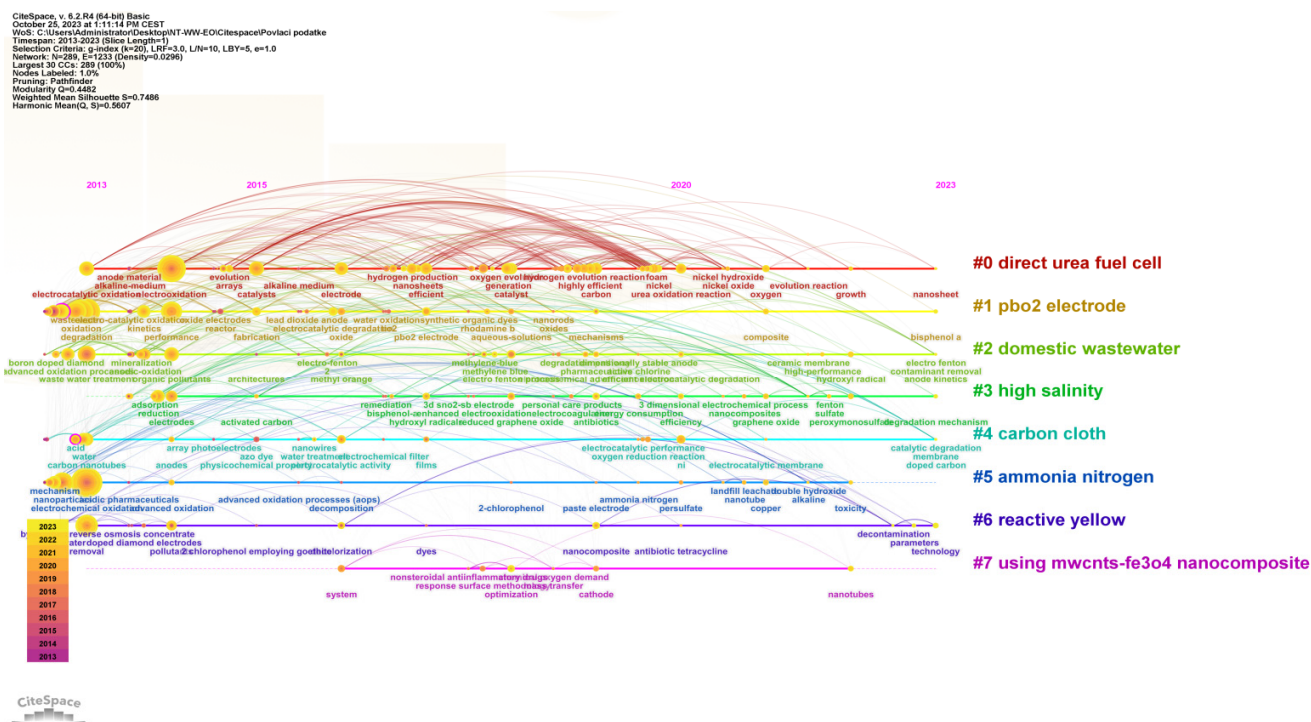

Figure. S3. Timeline map.
